# Supplementary material
Source: ML conference proceedings conference paper supplement (https://openreview.net/forum?id=H3zMYwUsqeq)
Supplement: supplementary_material [file attachment]

# Using Hierarchies to Efficiently Combine Evidence with Dempster’s Rule of Combination (Supplementary material)

Daira Pinto Prieto<sup>1</sup>

Ronald de Haan<sup>1</sup>

<sup>1</sup>Institute for Logic, Language and Computation, University of Amsterdam, The Netherlands

## A ADDITIONAL PROOFS

In this appendix, we provide proofs for the statements for which we omitted a proof from the main paper.

*Proof (sketch) of Proposition 3.2.* The main idea behind this proof is the following. Whenever you combine two b.p.a.’s  $m_1$  and  $m_2$  whose proper focal elements are all of size at most  $c$  using DRC, the resulting mass function only assigns positive mass to sets of size at most  $c$ . For any frame  $\Theta$  of discernment of size  $n$ , the number of subsets of size at most  $c$  is upper bounded by  $(n + 1)^c$ —which is a polynomial. Therefore, one can compute the result of DRC in a brute force fashion in polynomial time.  $\square$

*Proof of Lemma 5.2.* Let us see that two pairs  $P_i = (B_i, \bar{B}_i)$  and  $P_j = (B_j, \bar{B}_j)$  of  $\mathcal{A}$  have at least one conflict. If  $P_i \not\# P_j$  then  $B_i \not\# B_j$  (1),  $\bar{B}_i \not\# \bar{B}_j$  (2),  $B_i \not\# \bar{B}_j$  (3) and  $\bar{B}_i \not\# \bar{B}_j$  (4). For (1), at least one of these three conditions must hold:

1.  $B_i \subseteq B_j$ ,
2.  $B_j \subseteq B_i$  or
3.  $B_i \cap B_j = \emptyset$ .

If  $B_i \subseteq B_j$ , then  $B_j \cap \bar{B}_i \neq \emptyset$  since the inclusion is strict. In addition,  $B_j \not\subseteq \bar{B}_i$  and, if  $B_j \neq \Theta$ ,  $\bar{B}_i \not\subseteq B_j$ . Therefore,  $\bar{B}_i \# B_j$ , which contradicts (2).

A similar reasoning can show that if  $B_j \subseteq B_i$ , and  $B_i \neq \Theta$ , then  $B_i \# \bar{B}_j$ , contradicting (3).

Finally, if  $B_i \cap B_j = \emptyset$ , then  $B_j \subseteq \bar{B}_i$  and  $B_i \subseteq \bar{B}_j$ , so  $\bar{B}_i \not\subseteq \bar{B}_j$  and  $\bar{B}_j \not\subseteq \bar{B}_i$  respectively. Furthermore, as these inclusions are not strict,  $\bar{B}_i \cap \bar{B}_j \neq \emptyset$ . This means that  $\bar{B}_i \# \bar{B}_j$  and contradicts (4).

Due to all of the above three conditions implies a contradiction, we can conclude that there is at least one conflict between elements of  $P_i$  and  $P_j$ .

Now, let us prove that if there is a conflict between  $B_i$ ,  $B_j$  and  $((B_i, \bar{B}_i), (B_j, \bar{B}_j)) \notin C_4$  then  $\bar{B}_i \cap \bar{B}_j = \emptyset$ ,  $\bar{B}_i \subseteq B_j$  and  $\bar{B}_j \subseteq B_i$ , and as a consequence,  $((B_i, \bar{B}_i), (B_j, \bar{B}_j)) \in C_1$ .

On the one hand,  $\bar{B}_i \cap \bar{B}_j = \emptyset$  implies  $\bar{B}_i \subseteq B_j$  and  $\bar{B}_j \subseteq B_i$ , since that empty intersection implies that all the elements of  $\bar{B}_i$  (resp.  $\bar{B}_j$ ) are contained in the complement of  $\bar{B}_j$  (resp.  $\bar{B}_i$ ).

On the other hand, if  $\bar{B}_i \cap \bar{B}_j \neq \emptyset$ , then not only  $B_i$  has a conflict with  $B_j$  but also (a)  $B_i$  has a conflict with  $\bar{B}_j$ , (b)  $\bar{B}_i$  has a conflict with  $B_j$  and (c)  $\bar{B}_i$  has a conflict with  $\bar{B}_j$ .

- (a) First,  $B_i \# B_j$  implies  $B_i \not\subseteq B_j$ , so there is an element in  $B_i$  which belong to  $\bar{B}_j$  and  $B_i \cap \bar{B}_j \neq \emptyset$ . Secondly,  $B_i \cap B_j \neq \emptyset$  so  $B_i \not\subseteq \bar{B}_j$ . Finally,  $\bar{B}_i \cap \bar{B}_j \neq \emptyset$ , so there is an element in  $\bar{B}_j$  which is not in  $B_i$ , i.e.,  $\bar{B}_j \not\subseteq B_i$ .
- (b) The conflict  $B_i \# B_j$  also implies  $B_i \cap B_j \neq \emptyset$  so  $B_j \not\subseteq \bar{B}_i$ . In addition,  $\bar{B}_i \cap \bar{B}_j \neq \emptyset$  proves that  $\bar{B}_i \not\subseteq B_j$ . Lastly, if  $\bar{B}_i \cap A_j = \emptyset$  then  $B_j \subseteq B_i$  which is not possible since  $B_i \# B_j$ .
- (c) On the one hand, our hypotheses is that  $\bar{B}_i \cap \bar{B}_j \neq \emptyset$ . On the other hand,  $\bar{B}_i \not\subseteq \bar{B}_j$  and  $\bar{B}_j \not\subseteq \bar{B}_i$  for  $B_i \not\subseteq B_j$  and  $B_j \not\subseteq B_i$  respectively.

Therefore, if  $B_i \# B_j$  then  $(B_i, \bar{B}_i) \# (B_j, \bar{B}_j)$  or  $(B_i, \bar{B}_i) \# (B_j, \bar{B}_j)$ .  $\square$

*Proof (sketch) of Proposition 5.5.* We describe the main lines of this reduction, and we omit a proof of correctness—which is analogous to the proof of Theorem 5.4. Let  $\Theta$  be a frame of discernment,  $\mathcal{A} = \{(B_i, \bar{B}_i)\}_{i=1}^m$  a set of complementary pairs over  $\Theta$ , and  $\ell$  a positive integer. We construct  $G = (V, E)$  by letting  $V = \{v_1, \dots, v_m\}$  and  $E = \{\{v_i, v_j\} \mid (B_i, \bar{B}_i) \# (B_j, \bar{B}_j)\}$ . Then  $\mathcal{A}$  and  $k$  form a yes-instance for PARTIAL-HIERARCHY if and only if  $G$  has a vertex cover of size  $k = m - \ell$ , and solutions are in one-to-one correspondence.  $\square$
